# Supplementary material
Source: publisher figshare collection journal article supplement (https://sage.figshare.com/ndownloader/files/18496949)
Supplement: Supplementary file 1 [file 18496949]

Appendix

Table A1: Individual Jockey Data

|  | | | | **2BB** | | | **3BB** | | | **4BB** | | | **5BB** | | | **Wager Outcome** |
| --- | --- | --- | --- | --- | --- | --- | --- | --- | --- | --- | --- | --- | --- | --- | --- | --- |
| **Jockey** | **Rides** | **Wins** | **Strike Rate** | **Actual** | **Expected** | **t Stat** | **Actual** | **Expected** | **t Stat** | **Actual** | **Expected** | **t stat** | **Actual** | **Expected** | **t Stat** | **$** |
| Grant Buckley | 18336 | 1596 | 0.09 | 166 | 138.83 | 2.53 | 23 | 12.07 | 2.98 | 2 | 1.05 | 0.86 | 1 | 0.09 | 2.75 | -494.75 |
| Greg Ryan | 13691 | 2622 | 0.19 | 556 | 501.95 | 2.99 | 111 | 96.06 | 1.41 | 20 | 18.38 | 0.32 | 4 | 3.52 | 0.22 | -408.00 |
| Jeff Penza | 13593 | 1351 | 0.10 | 166 | 134.18 | 3.06 | 16 | 13.32 | 0.69 | 0 | 1.32 | -1.05 | 0 | 0.13 | -0.33 | -300.00 |
| Brad Rawiller | 12977 | 2225 | 0.17 | 428 | 381.32 | 2.87 | 83 | 65.33 | 2.03 | 12 | 11.19 | 0.21 | 1 | 1.92 | -0.56 | -217.00 |
| Kerrin McEvoy | 8890 | 1190 | 0.13 | 162 | 159.16 | 0.26 | 24 | 21.27 | 0.55 | 2 | 2.84 | -0.44 | 0 | 0.38 | -0.53 | -228.69 |
| Peter Graham | 12724 | 1454 | 0.11 | 188 | 166.04 | 1.92 | 19 | 18.95 | 0.01 | 1 | 2.16 | -0.71 | 0 | 0.25 | -0.44 | -435.96 |
| Robert Thompson | 12053 | 1674 | 0.14 | 260 | 232.36 | 2.11 | 40 | 32.24 | 1.27 | 10 | 4.47 | 2.31 | 2 | 0.62 | 1.53 | -184.67 |
| Jim Byrne | 11388 | 1616 | 0.14 | 237 | 229.17 | 0.60 | 33 | 32.48 | 0.08 | 3 | 4.60 | -0.66 | 0 | 0.65 | -0.70 | -443.22 |
| Dale Spriggs | 11230 | 1314 | 0.12 | 158 | 153.63 | 0.40 | 15 | 17.95 | -0.65 | 1 | 2.10 | -0.68 | 0 | 0.24 | -0.44 | -415.38 |
| Hugh Bowman | 10814 | 1748 | 0.16 | 294 | 282.39 | 0.82 | 60 | 45.60 | 1.98 | 12 | 7.36 | 1.48 | 2 | 1.19 | 0.64 | -257.58 |
| Luke Nolen | 10134 | 1411 | 0.14 | 221 | 196.32 | 2.04 | 46 | 27.30 | 3.33 | 8 | 3.79 | 1.91 | 1 | 0.53 | 0.57 | -113.78 |
| Jason Taylor | 10079 | 723 | 0.07 | 58 | 51.79 | 0.93 | 2 | 3.71 | -0.84 | 0 | 0.26 | -0.48 | 0 | 0.02 | -0.94 | -177.80 |
| Jay Ford | 9916 | 873 | 0.09 | 87 | 76.77 | 1.28 | 10 | 6.74 | 1.18 | 1 | 0.59 | 0.49 | 0 | 0.05 | -0.20 | -112.95 |
| Andrew Gibbons | 9793 | 661 | 0.07 | 55 | 44.55 | 1.67 | 11 | 3.00 | 4.40 | 1 | 0.20 | 1.70 | 0 | 0.01 | -0.11 | -256.20 |
| Linda Meech | 9578 | 1292 | 0.13 | 184 | 174.15 | 0.87 | 24 | 23.46 | 0.10 | 7 | 3.16 | 1.92 | 2 | 0.42 | 2.13 | -262.24 |
| Dwayne Dunn | 9330 | 1265 | 0.14 | 188 | 171.38 | 1.47 | 33 | 23.20 | 1.90 | 2 | 3.14 | -0.57 | 0 | 0.42 | -0.57 | -271.52 |
| Brendan Ward | 9257 | 1138 | 0.12 | 165 | 139.78 | 2.43 | 34 | 17.15 | 3.79 | 5 | 2.10 | 1.79 | 0 | 0.26 | -0.45 | -247.00 |
| Corey Brown | 9092 | 1337 | 0.15 | 216 | 196.46 | 1.63 | 39 | 28.85 | 1.76 | 8 | 4.23 | 1.62 | 2 | 0.62 | 1.52 | -150.65 |
| Christian Reith | 9047 | 986 | 0.11 | 129 | 107.35 | 2.35 | 22 | 11.68 | 2.84 | 2 | 1.27 | 0.59 | 0 | 0.14 | -0.34 | -278.08 |
| Terry Treichel | 9032 | 974 | 0.11 | 160 | 104.93 | 6.04 | 33 | 11.29 | 6.06 | 8 | 1.21 | 5.61 | 3 | 0.13 | 7.17 | -119.00 |
| Glen Boss | 8892 | 1211 | 0.14 | 173 | 164.79 | 0.74 | 23 | 22.41 | 0.12 | 6 | 3.04 | 1.51 | 3 | 0.41 | 3.54 | -348.76 |
| Chris Whiteley | 8850 | 1279 | 0.14 | 206 | 184.70 | 1.84 | 27 | 26.65 | 0.06 | 3 | 3.84 | -0.38 | 0 | 0.55 | -1.01 | -323.94 |
| Matthew Paget | 8837 | 720 | 0.08 | 57 | 58.58 | -0.23 | 10 | 4.76 | 2.27 | 2 | 0.39 | 2.41 | 0 | 0.03 | -0.16 | -282.35 |
| Glen Colless | 8702 | 1425 | 0.16 | 285 | 233.19 | 4.06 | 63 | 38.14 | 3.73 | 12 | 6.23 | 2.00 | 4 | 1.02 | 2.53 | -204.00 |
| Damien Oliver | 8537 | 1423 | 0.17 | 243 | 237.03 | 0.47 | 54 | 39.46 | 2.15 | 15 | 6.56 | 2.86 | 4 | 1.09 | 2.36 | -218.15 |
| Scott Thurlow | 8508 | 603 | 0.07 | 59 | 42.67 | 2.69 | 4 | 3.01 | 0.54 | 0 | 0.21 | -0.43 | 0 | 0.01 | -0.12 | -240.00 |
| Chris Munce | 8475 | 1217 | 0.14 | 179 | 174.62 | 0.39 | 24 | 25.04 | -0.19 | 1 | 3.59 | -1.20 | 0 | 0.51 | -0.62 | -225.81 |
| Michael Travers | 8417 | 828 | 0.10 | 101 | 81.35 | 2.41 | 9 | 7.98 | 0.34 | 0 | 0.78 | -0.81 | 0 | 0.08 | -0.25 | -133.00 |
| Darren Gauci | 8246 | 765 | 0.09 | 79 | 70.88 | 1.06 | 7 | 6.56 | 0.16 | 1 | 0.61 | 0.46 | 0 | 0.06 | -0.21 | -70.50 |
| Kathy O'Hara | 8204 | 755 | 0.09 | 78 | 69.39 | 1.14 | 6 | 6.37 | -0.14 | 0 | 0.58 | -0.70 | 0 | 0.05 | -0.21 | -134.25 |
| Larry Cassidy | 8168 | 1026 | 0.13 | 133 | 128.75 | 0.43 | 17 | 16.14 | 0.20 | 3 | 2.02 | 0.61 | 1 | 0.25 | 1.31 | -290.00 |
| Joe Bowditch | 8078 | 809 | 0.10 | 98 | 80.92 | 2.11 | 12 | 8.08 | 1.29 | 0 | 0.81 | -0.82 | 0 | 0.08 | -0.26 | -55.20 |
| Stephen Baster | 8003 | 801 | 0.10 | 105 | 80.07 | 3.10 | 16 | 7.99 | 2.66 | 2 | 0.80 | 1.23 | 1 | 0.08 | 2.97 | -191.00 |
| Nash Rawiller | 7815 | 1534 | 0.20 | 314 | 300.91 | 0.94 | 58 | 59.00 | -0.12 | 13 | 11.56 | 0.36 | 3 | 2.26 | 0.41 | -217.95 |
| Mathew Cahill | 7790 | 1152 | 0.15 | 178 | 170.21 | 0.70 | 22 | 25.13 | -0.58 | 2 | 3.71 | -0.78 | 0 | 0.55 | -0.64 | -287.41 |
| Ben Melham | 7640 | 978 | 0.13 | 142 | 125.07 | 1.74 | 14 | 15.98 | -0.46 | 3 | 2.04 | 0.60 | 1 | 0.26 | 1.29 | -69.65 |
| Rod Quinn | 7474 | 762 | 0.10 | 102 | 77.59 | 3.10 | 21 | 7.89 | 4.39 | 4 | 0.80 | 3.26 | 1 | 0.08 | 2.92 | -102.00 |
| Michael Heagney | 7440 | 469 | 0.06 | 27 | 29.50 | -0.49 | 0 | 1.85 | -1.30 | 0 | 0.12 | -0.32 | 0 | 0.01 | -0.08 | -143.70 |
| Paul Hammersley | 7428 | 899 | 0.12 | 84 | 108.68 | -2.70 | 9 | 13.13 | -1.06 | 1 | 1.58 | -0.41 | 0 | 0.19 | -0.39 | -416.96 |
| Michael Rodd | 7428 | 1137 | 0.15 | 189 | 173.89 | 1.35 | 41 | 26.57 | 2.59 | 10 | 4.06 | 2.57 | 3 | 0.62 | 2.60 | -35.05 |
| Danny Nikolic | 7307 | 919 | 0.13 | 142 | 115.46 | 2.82 | 23 | 14.49 | 2.08 | 4 | 1.82 | 1.44 | 0 | 0.23 | -0.42 | -182.29 |
| Tim Clark | 7235 | 795 | 0.11 | 97 | 87.25 | 1.17 | 16 | 9.56 | 1.94 | 2 | 1.05 | 0.84 | 0 | 0.11 | -0.30 | -216.65 |
| Daniel Griffin | 7196 | 960 | 0.13 | 146 | 127.94 | 1.84 | 31 | 17.03 | 3.13 | 6 | 2.27 | 2.20 | 1 | 0.30 | 1.12 | -199.80 |
| Justin P Stanley | 7185 | 708 | 0.10 | 75 | 69.67 | 0.71 | 7 | 6.85 | 0.06 | 0 | 0.67 | -0.75 | 0 | 0.07 | -0.23 | -273.06 |
| Scott Pollard | 7173 | 548 | 0.08 | 50 | 41.79 | 1.38 | 8 | 3.18 | 2.55 | 1 | 0.24 | 1.42 | 0 | 0.02 | -0.12 | -164.25 |
| Craig Williams | 7126 | 1058 | 0.15 | 178 | 156.93 | 1.98 | 38 | 23.26 | 2.85 | 8 | 3.44 | 2.16 | 2 | 0.51 | 1.81 | -70.50 |
| Mitchell Bell | 7066 | 798 | 0.11 | 99 | 90.01 | 1.07 | 15 | 10.14 | 1.43 | 2 | 1.14 | 0.72 | 1 | 0.13 | 2.19 | -30.79 |
| Steven Arnold | 6956 | 892 | 0.13 | 137 | 114.26 | 2.44 | 28 | 14.62 | 3.26 | 2 | 1.87 | 0.09 | 0 | 0.24 | -0.43 | -120.25 |
| Brad Clark | 6819 | 534 | 0.08 | 56 | 41.74 | 2.40 | 7 | 3.26 | 1.96 | 1 | 0.25 | 1.37 | 0 | 0.02 | -0.13 | -138.00 |
| Tommy Berry | 6771 | 808 | 0.12 | 106 | 96.30 | 1.12 | 20 | 11.47 | 2.36 | 3 | 1.36 | 1.26 | 1 | 0.16 | 1.85 | -137.75 |
| Matthew Bennett | 6769 | 665 | 0.10 | 65 | 65.23 | -0.03 | 10 | 6.39 | 1.34 | 1 | 0.63 | 0.43 | 0 | 0.06 | -0.23 | -270.45 |
| Andrew Bloomfield | 6688 | 600 | 0.09 | 71 | 53.74 | 2.58 | 5 | 4.81 | 0.08 | 0 | 0.43 | -0.61 | 0 | 0.04 | -0.18 | -165.33 |
| Richard Bensley | 6569 | 650 | 0.10 | 69 | 64.22 | 0.66 | 8 | 6.34 | 0.62 | 1 | 0.62 | 0.43 | 0 | 0.06 | -0.23 | -229.43 |
| Brenton Avdulla | 6432 | 754 | 0.12 | 97 | 88.27 | 1.06 | 13 | 10.32 | 0.78 | 1 | 1.21 | -0.17 | 0 | 0.14 | -0.33 | -195.60 |
| Jon Grisedale | 6325 | 518 | 0.08 | 44 | 42.34 | 0.28 | 4 | 3.45 | 0.28 | 0 | 0.28 | -0.49 | 0 | 0.02 | -0.14 | -204.40 |
| Glenn Lynch | 6236 | 596 | 0.10 | 57 | 56.87 | 0.02 | 5 | 5.42 | -0.17 | 0 | 0.52 | -0.65 | 0 | 0.05 | -0.20 | -186.80 |
| James Winks | 6229 | 645 | 0.10 | 70 | 66.68 | 0.45 | 7 | 6.88 | 0.04 | 1 | 0.71 | 0.31 | 0 | 0.07 | -0.24 | -203.20 |
| Kevin Sweeney | 6125 | 754 | 0.12 | 111 | 92.70 | 2.17 | 13 | 11.38 | 0.45 | 2 | 1.40 | 0.46 | 0 | 0.17 | -0.36 | -111.40 |
| Darren Beadman | 6124 | 1235 | 0.20 | 278 | 248.86 | 2.31 | 63 | 50.11 | 1.70 | 16 | 10.08 | 1.59 | 3 | 2.03 | 0.56 | -127.18 |
| Jamie Mott | 6044 | 844 | 0.14 | 140 | 117.72 | 2.38 | 25 | 16.40 | 1.98 | 2 | 2.28 | -0.17 | 0 | 0.32 | -0.49 | -161.46 |
| Raymond Spokes | 5910 | 604 | 0.10 | 57 | 61.63 | -0.66 | 5 | 6.28 | -0.48 | 0 | 0.64 | -0.72 | 0 | 0.06 | -0.23 | -136.80 |
| Davin Green | 5902 | 331 | 0.06 | 23 | 18.51 | 1.11 | 3 | 1.03 | 1.85 | 0 | 0.06 | -0.23 | 0 | 0.00 | -0.05 | -119.03 |
| Nicholas Hall | 5868 | 737 | 0.13 | 92 | 92.44 | -0.05 | 18 | 11.58 | 1.76 | 4 | 1.45 | 1.89 | 0 | 0.18 | -0.38 | -185.00 |
| Scott Seamer | 5780 | 725 | 0.13 | 125 | 90.81 | 4.11 | 20 | 11.36 | 2.39 | 3 | 1.42 | 1.18 | 0 | 0.18 | -0.37 | 0.00 |
| Jim Cassidy | 5688 | 769 | 0.14 | 129 | 103.83 | 2.86 | 24 | 14.00 | 2.48 | 3 | 1.89 | 0.72 | 0 | 0.25 | -0.45 | 64.10 |
| Leanne G Henry | 5682 | 369 | 0.06 | 30 | 23.90 | 1.33 | 3 | 1.54 | 1.12 | 0 | 0.10 | -0.30 | 0 | 0.01 | -0.08 | -198.20 |
| Steven King | 5621 | 575 | 0.10 | 60 | 58.72 | 0.19 | 7 | 5.99 | 0.39 | 0 | 0.61 | -0.71 | 0 | 0.06 | -0.22 | -252.10 |
| Bradley Vale | 5565 | 285 | 0.05 | 17 | 14.54 | 0.68 | 1 | 0.74 | 0.29 | 0 | 0.04 | -0.18 | 0 | 0.00 | -0.04 | -130.60 |
| Timothy Bell | 5396 | 647 | 0.12 | 86 | 77.46 | 1.10 | 10 | 9.26 | 0.23 | 1 | 1.11 | -0.09 | 0 | 0.13 | -0.33 | -199.30 |
| Darryl McLellan | 5394 | 689 | 0.13 | 103 | 87.88 | 1.85 | 13 | 11.19 | 0.50 | 0 | 1.42 | -1.07 | 0 | 0.18 | -0.37 | -19.41 |
| Ben Looker | 5352 | 526 | 0.10 | 68 | 51.60 | 2.54 | 6 | 5.05 | 0.40 | 1 | 0.49 | 0.66 | 0 | 0.05 | -0.20 | -170.75 |
| Noel Callow | 5337 | 943 | 0.18 | 174 | 166.44 | 0.71 | 36 | 29.35 | 1.14 | 8 | 5.17 | 1.07 | 3 | 0.91 | 1.84 | -17.88 |
| Brad Pengelly | 5335 | 736 | 0.14 | 101 | 101.40 | -0.05 | 12 | 13.95 | -0.49 | 0 | 1.92 | -1.23 | 0 | 0.26 | -0.45 | -264.00 |
| Roly Saxton | 5174 | 504 | 0.10 | 49 | 49.00 | 0.00 | 6 | 4.75 | 0.30 | 1 | 0.46 | 0.33 | 0 | 0.04 | -0.07 | -177.70 |
| Dale Missen | 5135 | 715 | 0.14 | 113 | 99.42 | 1.58 | 15 | 13.81 | 0.30 | 4 | 1.92 | 1.34 | 1 | 0.27 | 1.25 | -199.75 |
| Glyn Schofield | 5084 | 664 | 0.13 | 82 | 86.59 | -0.57 | 8 | 11.28 | -0.91 | 0 | 1.47 | -1.07 | 0 | 0.19 | -0.38 | -49.65 |
| Nick Souquet | 5058 | 728 | 0.14 | 108 | 104.64 | 0.38 | 14 | 15.02 | -0.25 | 1 | 2.15 | -0.69 | 0 | 0.31 | -0.48 | -267.26 |
| Dean Tanti | 4947 | 426 | 0.09 | 50 | 36.60 | 2.43 | 9 | 3.14 | 3.12 | 1 | 0.27 | 1.30 | 0 | 0.02 | -0.14 | -51.10 |
| Trinity Bannon | 4809 | 465 | 0.10 | 47 | 44.87 | 0.35 | 4 | 4.32 | -0.15 | 0 | 0.42 | -0.59 | 0 | 0.04 | -0.18 | -235.00 |
| Ken Dunbar | 4795 | 402 | 0.08 | 46 | 33.62 | 2.33 | 8 | 2.81 | 2.93 | 1 | 0.23 | 1.47 | 0 | 0.02 | -0.13 | -86.00 |
| Adrian Layt | 4731 | 298 | 0.06 | 23 | 18.71 | 1.06 | 0 | 1.17 | -1.04 | 0 | 0.07 | -0.26 | 0 | 0.00 | -0.06 | -67.90 |
| Anthony Cavallo | 4699 | 390 | 0.08 | 28 | 32.29 | -0.82 | 3 | 2.67 | 0.19 | 1 | 0.22 | 1.54 | 0 | 0.02 | -0.13 | -225.67 |
| Tegan Harrison | 4678 | 466 | 0.10 | 48 | 46.32 | 0.27 | 4 | 4.60 | -0.26 | 0 | 0.46 | -0.61 | 0 | 0.04 | -0.19 | -192.40 |
| Kody Nestor | 4652 | 564 | 0.12 | 74 | 68.26 | 0.79 | 10 | 8.25 | 0.57 | 1 | 1.00 | 0.00 | 0 | 0.12 | -0.30 | -203.50 |
| Robbie Brewer | 4497 | 365 | 0.08 | 38 | 29.54 | 1.69 | 5 | 2.39 | 1.60 | 1 | 0.19 | 1.70 | 0 | 0.02 | -0.11 | -86.70 |
| Sheree Drake | 4480 | 340 | 0.08 | 29 | 25.73 | 0.70 | 0 | 1.94 | -1.32 | 0 | 0.15 | -0.36 | 0 | 0.01 | -0.10 | -139.80 |
| Jeff Kehoe | 4471 | 205 | 0.05 | 14 | 9.35 | 1.59 | 0 | 0.42 | -0.63 | 0 | 0.02 | -0.13 | 0 | 0.00 | -0.03 | -112.95 |
| Geoffrey Snowden | 4465 | 352 | 0.08 | 29 | 27.67 | 0.27 | 3 | 2.17 | 0.53 | 0 | 0.17 | -0.38 | 0 | 0.01 | -0.10 | -184.60 |
| Joshua Parr | 4462 | 655 | 0.15 | 112 | 96.00 | 1.92 | 25 | 14.05 | 2.73 | 7 | 2.05 | 3.04 | 2 | 0.30 | 2.71 | 40.95 |
| Matthew Palmer | 4447 | 385 | 0.09 | 38 | 33.24 | 0.90 | 4 | 2.86 | 0.63 | 0 | 0.25 | -0.46 | 0 | 0.02 | -0.13 | -109.45 |
| Blake Spriggs | 4445 | 436 | 0.10 | 43 | 42.67 | 0.06 | 5 | 4.17 | 0.38 | 1 | 0.41 | 0.85 | 0 | 0.04 | -0.18 | -168.80 |
| Jake Noonan | 4417 | 421 | 0.10 | 40 | 40.03 | -0.01 | 4 | 3.80 | 0.10 | 1 | 0.36 | 0.98 | 0 | 0.03 | -0.17 | -125.10 |
| Terry Jones | 4359 | 262 | 0.06 | 17 | 15.69 | 0.35 | 1 | 0.94 | 0.06 | 0 | 0.06 | -0.22 | 0 | 0.00 | -0.06 | -104.10 |
| Garry Murphy | 4240 | 406 | 0.10 | 50 | 38.78 | 2.00 | 8 | 3.70 | 2.11 | 1 | 0.35 | 1.00 | 0 | 0.03 | -0.17 | -60.35 |
| Bryan Murphy | 4179 | 306 | 0.07 | 26 | 22.33 | 0.84 | 0 | 1.63 | -1.21 | 0 | 0.12 | -0.32 | 0 | 0.01 | -0.09 | -135.30 |
| Nathan Berry | 4169 | 348 | 0.08 | 31 | 28.97 | 0.41 | 2 | 2.40 | -0.25 | 0 | 0.20 | -0.41 | 0 | 0.02 | -0.11 | -90.50 |
| Luke Rolls | 4164 | 344 | 0.08 | 38 | 28.34 | 1.98 | 6 | 2.33 | 2.28 | 1 | 0.19 | 1.71 | 0 | 0.02 | -0.11 | -121.90 |
| Peter Wells | 4155 | 375 | 0.09 | 45 | 33.75 | 2.13 | 7 | 3.03 | 2.15 | 1 | 0.27 | 1.28 | 0 | 0.02 | -0.14 | -34.40 |
| Skye Bogenhuber | 4101 | 504 | 0.12 | 60 | 61.82 | -0.26 | 7 | 7.57 | -0.19 | 1 | 0.93 | 0.07 | 0 | 0.11 | -0.30 | -240.65 |
| Kevin Forrester | 4067 | 368 | 0.09 | 41 | 33.21 | 1.49 | 6 | 2.99 | 1.63 | 1 | 0.27 | 1.28 | 0 | 0.02 | -0.14 | -58.25 |
| Darren Jones | 4004 | 482 | 0.12 | 68 | 57.90 | 1.51 | 10 | 6.94 | 1.08 | 0 | 0.83 | -0.81 | 0 | 0.10 | -0.28 | -43.90 |
| Chris O'Brien | 3967 | 455 | 0.11 | 64 | 52.07 | 1.86 | 10 | 5.95 | 1.55 | 2 | 0.68 | 1.45 | 0 | 0.08 | -0.25 | 7.70 |
| Simon Miller | 3929 | 359 | 0.09 | 37 | 32.71 | 0.83 | 4 | 2.97 | 0.56 | 0 | 0.27 | -0.48 | 0 | 0.02 | -0.14 | -174.30 |
| Michael Squires | 3911 | 307 | 0.08 | 24 | 24.02 | 0.00 | 3 | 1.87 | 0.78 | 2 | 0.15 | 4.52 | 1 | 0.01 | 8.69 | -172.05 |
| Cecily Eaton | 3776 | 253 | 0.07 | 29 | 16.88 | 3.17 | 3 | 1.12 | 1.69 | 0 | 0.07 | -0.25 | 0 | 0.00 | -0.06 | -53.00 |
| Michael Hackett | 3712 | 247 | 0.07 | 19 | 16.37 | 0.70 | 1 | 1.08 | -0.07 | 0 | 0.07 | -0.25 | 0 | 0.00 | -0.06 | -153.40 |
| Libby Hopwood | 3675 | 324 | 0.09 | 39 | 28.48 | 2.16 | 6 | 2.50 | 2.10 | 1 | 0.22 | 1.55 | 0 | 0.02 | -0.12 | -87.90 |
| Robyn Freeman-Key | 3664 | 373 | 0.10 | 40 | 37.87 | 0.39 | 3 | 3.84 | -0.40 | 0 | 0.39 | -0.56 | 0 | 0.04 | -0.18 | -81.80 |
| Stephen Traecey | 3565 | 380 | 0.11 | 61 | 40.40 | 3.63 | 10 | 4.28 | 2.59 | 3 | 0.45 | 3.43 | 0 | 0.05 | -0.20 | 18.00 |
| Allan Chau | 3502 | 336 | 0.10 | 37 | 32.14 | 0.95 | 4 | 3.07 | 0.50 | 0 | 0.29 | -0.50 | 0 | 0.03 | -0.15 | -93.70 |
| Sam Clipperton | 3439 | 355 | 0.10 | 44 | 36.54 | 1.38 | 1 | 3.75 | -1.33 | 0 | 0.38 | -0.56 | 0 | 0.04 | -0.18 | -25.85 |
| Jason Collett | 3439 | 426 | 0.12 | 72 | 52.65 | 3.03 | 16 | 6.49 | 3.47 | 1 | 0.80 | 0.20 | 0 | 0.10 | -0.28 | N/A |
| Jake Duffy | 3436 | 294 | 0.09 | 26 | 25.07 | 0.20 | 2 | 2.13 | -0.08 | 0 | 0.18 | -0.39 | 0 | 0.02 | -0.11 | -104.90 |
| Joe Galea | 3386 | 300 | 0.09 | 29 | 26.49 | 0.53 | 0 | 2.33 | -1.44 | 0 | 0.20 | -0.41 | 0 | 0.02 | -0.12 | -88.05 |
| Luke Cumberland | 3372 | 171 | 0.05 | 13 | 8.62 | 1.57 | 1 | 0.43 | 0.83 | 0 | 0.02 | -0.14 | 0 | 0.00 | -0.01 | -45.60 |
| James McDonald | 3371 | 680 | 0.20 | 147 | 136.97 | 1.07 | 41 | 27.56 | 2.39 | 13 | 5.54 | 2.71 | 4 | 1.11 | 2.27 | -20.51 |
| Cameron Quilty | 3265 | 174 | 0.05 | 8 | 9.22 | -0.42 | 1 | 0.49 | 0.71 | 0 | 0.03 | -0.15 | 0 | 0.00 | -0.03 | -127.50 |
| Cyril Small | 3236 | 190 | 0.06 | 11 | 11.10 | -0.03 | 1 | 0.64 | 0.42 | 0 | 0.04 | -0.19 | 0 | 0.00 | -0.04 | -131.85 |
| William Pearson | 3173 | 334 | 0.11 | 39 | 35.05 | 0.75 | 5 | 3.67 | 0.65 | 0 | 0.38 | -1.00 | 0 | 0.04 | -0.06 | -123.24 |
| Lane Moloney | 3122 | 261 | 0.08 | 24 | 21.74 | 0.53 | 4 | 1.80 | 1.54 | 0 | 0.15 | -0.35 | 0 | 0.01 | -0.10 | -115.43 |
| Priscilla Schmidt | 3122 | 285 | 0.09 | 22 | 25.93 | -0.85 | 1 | 2.35 | -0.83 | 0 | 0.21 | -0.42 | 0 | 0.02 | -0.13 | -138.80 |
| Anthony Allen | 3054 | 313 | 0.10 | 36 | 31.98 | 0.79 | 5 | 3.26 | 0.91 | 1 | 0.33 | 1.06 | 0 | 0.03 | -0.17 | -87.20 |
| Jasen Watkins | 3043 | 241 | 0.08 | 19 | 19.01 | 0.00 | 1 | 1.49 | -0.38 | 0 | 0.12 | -0.32 | 0 | 0.01 | -0.09 | -113.00 |
| Jason Maskiell | 3041 | 316 | 0.10 | 38 | 32.73 | 1.03 | 6 | 3.38 | 1.34 | 0 | 0.35 | -0.53 | 0 | 0.04 | -0.17 | -122.50 |
| John Kissick | 3029 | 374 | 0.12 | 42 | 46.06 | -0.68 | 2 | 5.66 | -1.44 | 1 | 0.69 | 0.33 | 0 | 0.08 | -0.26 | -1156.30 |
| Justin W Stanley | 2983 | 236 | 0.08 | 20 | 18.59 | 0.35 | 0 | 1.46 | -1.14 | 0 | 0.11 | -0.32 | 0 | 0.01 | -0.09 | -122.70 |
| Daniel Ganderton | 2967 | 297 | 0.10 | 24 | 29.63 | -1.15 | 1 | 2.95 | -1.07 | 0 | 0.29 | -0.50 | 0 | 0.03 | -0.16 | -93.80 |
| Shaun Guymer | 2948 | 211 | 0.07 | 16 | 15.03 | 0.27 | 3 | 1.07 | 1.77 | 0 | 0.08 | -0.25 | 0 | 0.01 | -0.07 | -49.80 |
| Patrick Murphy | 2895 | 292 | 0.10 | 26 | 29.35 | -0.69 | 1 | 2.94 | -1.06 | 0 | 0.29 | -0.49 | 0 | 0.03 | -0.15 | -96.40 |
| Joseph Azzopardi | 2886 | 245 | 0.08 | 24 | 20.71 | 0.78 | 4 | 1.74 | 1.61 | 2 | 0.15 | 4.43 | 0 | 0.01 | -0.10 | -136.50 |
| Robert Agnew | 2884 | 189 | 0.07 | 18 | 12.32 | 1.74 | 4 | 0.80 | 3.41 | 2 | 0.05 | 8.14 | 0 | 0.00 | -0.05 | -42.40 |
| Mark Newnham | 2815 | 328 | 0.12 | 51 | 38.10 | 2.36 | 10 | 4.41 | 2.49 | 2 | 0.51 | 1.88 | 1 | 0.06 | 3.43 | -119.84 |
| Craig Franklin | 2815 | 225 | 0.08 | 23 | 17.90 | 1.30 | 2 | 1.42 | 0.46 | 0 | 0.11 | -0.31 | 0 | 0.01 | -0.09 | -78.45 |
| Jamie Anstice | 2800 | 264 | 0.09 | 25 | 24.80 | 0.04 | 2 | 2.32 | -0.20 | 0 | 0.22 | -0.42 | 0 | 0.02 | -0.13 | -131.20 |
| Scott Sheargold | 2796 | 283 | 0.10 | 42 | 28.54 | 2.81 | 7 | 2.87 | 2.31 | 1 | 0.29 | 1.22 | 0 | 0.03 | -0.15 | -44.70 |
| Josh Adams | 2796 | 253 | 0.09 | 20 | 22.80 | -0.65 | 0 | 2.05 | -1.35 | 0 | 0.18 | -0.39 | 0 | 0.02 | -0.11 | -110.60 |
| George Scimone | 2733 | 195 | 0.07 | 18 | 13.84 | 1.21 | 4 | 0.98 | 2.91 | 1 | 0.07 | 3.33 | 0 | 0.00 | -0.06 | -74.90 |
| Michael Palmer | 2668 | 196 | 0.07 | 22 | 14.33 | 2.19 | 3 | 1.04 | 1.83 | 0 | 0.08 | -0.26 | 0 | 0.01 | -0.07 | -62.85 |
| Marc Munday | 2662 | 245 | 0.09 | 34 | 22.46 | 2.68 | 7 | 2.05 | 3.27 | 2 | 0.19 | 3.87 | 0 | 0.02 | -0.12 | 7.30 |
| Alison Threadwell | 2654 | 190 | 0.07 | 19 | 13.53 | 1.60 | 0 | 0.96 | -0.93 | 0 | 0.07 | -0.24 | 0 | 0.00 | -0.07 | -69.30 |
| Neil Paine | 2628 | 237 | 0.09 | 21 | 21.28 | -0.07 | 3 | 1.90 | 0.75 | 0 | 0.17 | -0.38 | 0 | 0.02 | -0.12 | -126.70 |
| Tim Phillips | 2621 | 359 | 0.14 | 68 | 49.04 | 3.13 | 16 | 6.68 | 3.35 | 5 | 0.91 | 3.79 | 2 | 0.12 | 4.65 | -112.00 |
| Lorna Cook | 2612 | 212 | 0.08 | 18 | 17.13 | 0.23 | 3 | 1.38 | 1.31 | 1 | 0.11 | 2.49 | 0 | 0.01 | -0.09 | -69.00 |
| Chad Schofield | 2606 | 277 | 0.11 | 38 | 29.34 | 1.79 | 4 | 3.10 | 0.48 | 0 | 0.33 | -0.52 | 0 | 0.03 | -0.17 | 44.10 |
| Matthew McGuren | 2533 | 380 | 0.15 | 73 | 56.86 | 2.52 | 16 | 8.49 | 2.40 | 5 | 1.26 | 2.93 | 2 | 0.19 | 3.65 | -47.10 |
| Serg Lisnyy | 2483 | 172 | 0.07 | 21 | 11.85 | 2.86 | 4 | 0.81 | 3.36 | 0 | 0.06 | -0.22 | 0 | 0.00 | -0.06 | -10.20 |
| Josh Cartwright | 2477 | 255 | 0.10 | 31 | 26.15 | 1.06 | 6 | 2.67 | 1.92 | 0 | 0.27 | -0.48 | 0 | 0.03 | -0.15 | -71.05 |
| Belinda Hodder | 2474 | 189 | 0.08 | 19 | 14.36 | 1.32 | 1 | 1.09 | -0.08 | 0 | 0.08 | -0.27 | 0 | 0.01 | -0.07 | -49.50 |
| Danny Peisley | 2460 | 254 | 0.10 | 31 | 26.12 | 1.07 | 3 | 2.68 | 0.19 | 0 | 0.27 | -0.47 | 0 | 0.03 | -0.15 | -79.05 |
| Dar Lunn | 2455 | 133 | 0.05 | 11 | 7.15 | 1.52 | 0 | 0.38 | -0.59 | 0 | 0.02 | -0.14 | 0 | 0.00 | -0.03 | -83.60 |
| Jess Taylor | 2448 | 182 | 0.07 | 19 | 13.46 | 1.63 | 4 | 0.99 | 2.88 | 1 | 0.07 | 3.20 | 0 | 0.01 | -0.07 | -32.90 |
| Mark Lister | 2430 | 253 | 0.10 | 36 | 26.24 | 2.13 | 5 | 2.71 | 1.31 | 0 | 0.28 | -0.48 | 0 | 0.03 | -0.15 | -80.74 |
| Robert Beattie | 2404 | 167 | 0.07 | 14 | 11.53 | 0.78 | 1 | 0.79 | 0.22 | 0 | 0.05 | -0.22 | 0 | 0.00 | -0.06 | -97.25 |
| Rachael Murray | 2402 | 299 | 0.12 | 44 | 37.09 | 1.29 | 6 | 4.59 | 0.62 | 0 | 0.57 | -0.68 | 0 | 0.07 | -0.23 | 37.70 |
| Adrian Robinson | 2361 | 236 | 0.10 | 30 | 23.49 | 1.49 | 4 | 2.33 | 1.03 | 0 | 0.23 | -0.44 | 0 | 0.02 | -0.14 | -78.95 |
| Adam Hyeronimus | 2349 | 303 | 0.13 | 35 | 38.96 | -0.73 | 8 | 4.99 | 1.26 | 1 | 0.64 | 0.41 | 0 | 0.08 | -0.25 | -121.10 |
| Ashley Butler | 2317 | 295 | 0.13 | 55 | 37.43 | 3.29 | 16 | 4.74 | 4.84 | 7 | 0.60 | 7.36 | 3 | 0.08 | 9.39 | -17.00 |
| Kacie Chater | 2247 | 112 | 0.05 | 5 | 5.53 | -0.24 | 0 | 0.27 | -0.50 | 0 | 0.01 | -0.11 | 0 | 0.00 | -0.02 | -75.00 |
| Kayla Nisbet | 2245 | 200 | 0.09 | 16 | 17.73 | -0.45 | 2 | 1.56 | 0.33 | 1 | 0.14 | 2.13 | 0 | 0.01 | -0.10 | -95.90 |
| James Geppert | 2244 | 170 | 0.08 | 16 | 12.80 | 0.97 | 0 | 0.96 | -0.93 | 0 | 0.07 | -0.25 | 0 | 0.01 | -0.07 | -60.20 |
| Jason Lee | 2239 | 177 | 0.08 | 19 | 13.91 | 1.47 | 0 | 1.09 | -0.99 | 0 | 0.08 | -0.27 | 0 | 0.01 | -0.08 | -90.52 |
| Daniel Northey | 2152 | 144 | 0.07 | 14 | 9.57 | 1.53 | 4 | 0.63 | 4.04 | 1 | 0.04 | 4.47 | 0 | 0.00 | -0.05 | -77.30 |
| Daniel Edmonds | 2128 | 158 | 0.07 | 15 | 11.66 | 1.06 | 2 | 0.85 | 1.18 | 0 | 0.06 | -0.24 | 0 | 0.00 | -0.06 | 16.60 |
| Brent Evans | 2039 | 295 | 0.14 | 47 | 42.54 | 0.80 | 12 | 6.12 | 2.22 | 6 | 0.88 | 4.83 | 3 | 0.13 | 7.10 | -30.10 |
| Shane Scriven | 2037 | 367 | 0.18 | 57 | 65.94 | -1.34 | 6 | 11.82 | -1.58 | 1 | 2.11 | -0.66 | 0 | 0.38 | -0.52 | -111.95 |
| Alex Stokes | 2028 | 158 | 0.08 | 11 | 12.23 | -0.38 | 2 | 0.94 | 1.03 | 0 | 0.07 | -0.25 | 0 | 0.01 | -0.07 | -79.50 |
| Tiffany Jeffries | 1991 | 126 | 0.06 | 17 | 7.91 | 3.45 | 3 | 0.49 | 3.41 | 1 | 0.03 | 5.22 | 0 | 0.00 | -0.04 | -47.00 |
| Matthew Dracos | 1924 | 150 | 0.08 | 23 | 11.62 | 3.60 | 5 | 0.89 | 4.10 | 1 | 0.07 | 3.28 | 0 | 0.01 | -0.07 | -22.00 |
| Aaron Huke | 1891 | 125 | 0.07 | 8 | 8.20 | -0.07 | 1 | 0.53 | 0.61 | 0 | 0.03 | -0.17 | 0 | 0.00 | -0.04 | -69.15 |
| Adam Gain | 1866 | 206 | 0.11 | 32 | 22.63 | 2.22 | 2 | 2.48 | -0.28 | 0 | 0.27 | -0.47 | 0 | 0.03 | -0.15 | 31.90 |
| Pietro Romeo | 1862 | 105 | 0.06 | 5 | 5.86 | -0.38 | 0 | 0.32 | -0.55 | 0 | 0.02 | -0.13 | 0 | 0.00 | -0.03 | -67.00 |
| Amanda Masters | 1843 | 136 | 0.07 | 9 | 9.96 | -0.33 | 0 | 0.72 | -0.81 | 0 | 0.05 | -0.21 | 0 | 0.00 | -0.05 | -84.30 |
| Ben Hull | 1821 | 170 | 0.09 | 19 | 15.78 | 0.89 | 1 | 1.46 | -0.36 | 0 | 0.13 | -0.34 | 0 | 0.01 | -0.10 | -31.95 |
| Taylor Lovelock-Wiggins | 1770 | 194 | 0.11 | 21 | 21.15 | -0.04 | 2 | 2.30 | -0.18 | 0 | 0.25 | -0.45 | 0 | 0.03 | -0.15 | -82.60 |
| Shaun Nolen | 1734 | 187 | 0.11 | 20 | 20.06 | -0.01 | 3 | 2.14 | 0.55 | 0 | 0.23 | -0.43 | 0 | 0.02 | -0.14 | -31.95 |
| Jamie Quinnell | 1682 | 166 | 0.10 | 19 | 16.28 | 0.75 | 3 | 1.59 | 1.05 | 0 | 0.15 | -0.36 | 0 | 0.01 | -0.11 | -58.15 |
| Ben Cornell | 1663 | 304 | 0.18 | 67 | 55.39 | 1.91 | 16 | 10.06 | 1.75 | 4 | 1.82 | 1.39 | 1 | 0.33 | 0.99 | -47.89 |
| Shirley Hunter | 1662 | 107 | 0.06 | 10 | 6.82 | 1.30 | 1 | 0.43 | 0.83 | 0 | 0.03 | -0.15 | 0 | 0.00 | -0.04 | -60.50 |
| Rebecca Williams | 1646 | 144 | 0.09 | 9 | 12.51 | -1.09 | 0 | 1.08 | -0.98 | 0 | 0.09 | -0.28 | 0 | 0.01 | -0.08 | -63.60 |
| Shane Moses | 1639 | 105 | 0.06 | 6 | 6.66 | -0.27 | 0 | 0.42 | -0.62 | 0 | 0.03 | -0.15 | 0 | 0.00 | -0.04 | -55.10 |
| Jessie Whipp | 1603 | 160 | 0.10 | 15 | 15.87 | -0.24 | 2 | 1.57 | 0.33 | 1 | 0.15 | 1.96 | 0 | 0.01 | -0.11 | -44.90 |
| Samantha Clenton | 1596 | 217 | 0.14 | 32 | 29.37 | 0.56 | 4 | 3.96 | 0.02 | 1 | 0.53 | 0.57 | 0 | 0.07 | -0.23 | -22.65 |
| Emily Kehoe | 1577 | 86 | 0.05 | 7 | 4.64 | 1.16 | 0 | 0.25 | -0.48 | 0 | 0.01 | -0.11 | 0 | 0.00 | -0.03 | -44.00 |
| Vicky Milligan | 1566 | 110 | 0.07 | 7 | 7.66 | -0.25 | 0 | 0.53 | -0.69 | 0 | 0.04 | -0.18 | 0 | 0.00 | -0.05 | -30.60 |
| Natalie Lye | 1565 | 62 | 0.04 | 3 | 2.42 | 0.39 | 0 | 0.09 | -0.29 | 0 | 0.00 | -0.06 | 0 | 0.00 | -0.01 | -41.60 |
| Jessica Drury | 1554 | 164 | 0.11 | 21 | 17.20 | 1.02 | 2 | 1.79 | 0.14 | 0 | 0.19 | -0.39 | 0 | 0.02 | -0.12 | -46.66 |
| Dallas Auckram | 1547 | 107 | 0.07 | 14 | 7.33 | 2.66 | 0 | 0.50 | -0.67 | 0 | 0.03 | -0.17 | 0 | 0.00 | -0.04 | -36.12 |
| Yusuke Ichikawa | 1530 | 116 | 0.08 | 9 | 8.72 | 0.10 | 0 | 0.65 | -0.77 | 0 | 0.05 | -0.20 | 0 | 0.00 | -0.05 | -44.45 |
| Jessica Payne | 1512 | 108 | 0.07 | 9 | 7.64 | 0.53 | 1 | 0.54 | 0.60 | 0 | 0.04 | -0.18 | 0 | 0.00 | -0.05 | -25.20 |
| Jason Collins | 1510 | 144 | 0.10 | 14 | 13.64 | 0.11 | 1 | 1.28 | -0.23 | 0 | 0.12 | -0.32 | 0 | 0.01 | -0.10 | -17.00 |
| Kayla McEwen | 1457 | 102 | 0.07 | 9 | 7.07 | 0.78 | 1 | 0.49 | 0.70 | 0 | 0.03 | -0.17 | 0 | 0.00 | -0.05 | -37.70 |
| Bradley Wallace | 1452 | 152 | 0.10 | 19 | 15.81 | 0.89 | 3 | 1.63 | 1.01 | 0 | 0.17 | -0.38 | 0 | 0.02 | -0.12 | -54.80 |
| Teresa Nikora | 1434 | 94 | 0.07 | 5 | 6.10 | -0.48 | 0 | 0.39 | -0.60 | 0 | 0.02 | -0.15 | 0 | 0.00 | -0.04 | -63.60 |
| Stacey Rawiller | 1421 | 101 | 0.07 | 8 | 7.11 | 0.36 | 1 | 0.50 | 0.68 | 0 | 0.03 | -0.17 | 0 | 0.00 | -0.04 | -46.60 |
| Brett Poulus | 1396 | 126 | 0.09 | 15 | 11.28 | 1.22 | 0 | 1.00 | -0.94 | 0 | 0.09 | -0.27 | 0 | 0.01 | -0.08 | -52.20 |
| Patrick Keane | 1390 | 119 | 0.09 | 11 | 10.10 | 0.31 | 2 | 0.85 | 1.18 | 1 | 0.07 | 3.20 | 0 | 0.01 | -0.07 | -56.40 |
| Kasie Stanley | 1377 | 107 | 0.08 | 5 | 8.24 | -1.22 | 0 | 0.63 | -0.75 | 0 | 0.05 | -0.20 | 0 | 0.00 | -0.05 | -85.20 |
| Matthew Gray | 1360 | 84 | 0.06 | 4 | 5.13 | -0.26 | 0 | 0.31 | -0.16 | 0 | 0.02 | -0.02 | 0 | 0.00 | 0.00 | -45.40 |
| Kane Bradley | 1358 | 93 | 0.07 | 8 | 6.30 | 0.73 | 1 | 0.42 | 0.85 | 0 | 0.03 | -0.16 | 0 | 0.00 | -0.04 | -34.40 |
| David Pisani | 1356 | 116 | 0.09 | 9 | 9.84 | -0.29 | 0 | 0.83 | -0.86 | 0 | 0.07 | -0.24 | 0 | 0.01 | -0.07 | -28.70 |
| Ben Vassallo | 1354 | 107 | 0.08 | 5 | 8.38 | -1.27 | 0 | 0.65 | -0.76 | 0 | 0.05 | -0.21 | 0 | 0.00 | -0.06 | -92.60 |
| Donald Barron | 1353 | 113 | 0.08 | 8 | 9.35 | -0.48 | 0 | 0.77 | -0.82 | 0 | 0.06 | -0.23 | 0 | 0.01 | -0.06 | -52.20 |
| Murray Lord | 1306 | 36 | 0.03 | 2 | 0.96 | 1.08 | 0 | 0.03 | -0.15 | 0 | 0.00 | -0.02 | 0 | 0.00 | 0.00 | -23.90 |
| Aaron Austin | 1305 | 93 | 0.07 | 4 | 6.56 | -1.07 | 0 | 0.46 | -0.64 | 0 | 0.03 | -0.17 | 0 | 0.00 | -0.05 | -73.30 |
| Sarah Gaffaney | 1277 | 68 | 0.05 | 5 | 3.57 | 0.80 | 1 | 0.18 | 1.82 | 0 | 0.01 | -0.09 | 0 | 0.00 | -0.02 | -38.10 |
| Shelley Walsh | 1275 | 88 | 0.07 | 11 | 6.00 | 2.20 | 0 | 0.41 | -0.61 | 0 | 0.03 | -0.16 | 0 | 0.00 | -0.04 | -33.50 |
| Wayne Wheatley | 1262 | 127 | 0.10 | 22 | 12.68 | 2.91 | 3 | 1.26 | 1.46 | 1 | 0.12 | 2.26 | 0 | 0.01 | -0.10 | 6.00 |
| Andrew Banks | 1257 | 113 | 0.09 | 12 | 10.07 | 0.67 | 1 | 0.89 | 0.11 | 0 | 0.08 | -0.26 | 0 | 0.01 | -0.08 | -33.10 |
| Lisa Cropp (NZ) | 1229 | 105 | 0.09 | 15 | 8.89 | 2.24 | 3 | 0.75 | 2.48 | 0 | 0.06 | -0.23 | 0 | 0.01 | -0.07 | 13.00 |
| Brooke Timmis | 1226 | 56 | 0.05 | 3 | 2.51 | 0.32 | 0 | 0.11 | -0.32 | 0 | 0.00 | -0.07 | 0 | 0.00 | -0.02 | -21.30 |
| Gabrielle Coleman | 1212 | 63 | 0.05 | 5 | 3.22 | 1.04 | 0 | 0.16 | -0.39 | 0 | 0.01 | -0.08 | 0 | 0.00 | -0.02 | -27.50 |
| Bruce Powell | 1205 | 68 | 0.06 | 3 | 3.78 | -0.43 | 0 | 0.21 | -0.44 | 0 | 0.01 | -0.10 | 0 | 0.00 | -0.02 | -57.20 |
| Andrew Stead | 1202 | 106 | 0.09 | 9 | 9.26 | -0.09 | 1 | 0.80 | 0.21 | 0 | 0.07 | -0.24 | 0 | 0.01 | -0.07 | -23.70 |
| Ashley Thompson | 1199 | 126 | 0.11 | 10 | 13.14 | -0.96 | 2 | 1.36 | 0.51 | 1 | 0.14 | 2.08 | 0 | 0.01 | -0.11 | -54.20 |
| Hari Singh | 1163 | 65 | 0.06 | 2 | 3.58 | -0.88 | 0 | 0.19 | -0.43 | 0 | 0.01 | -0.10 | 0 | 0.00 | -0.02 | -51.50 |
| Jeremy Starr | 1141 | 65 | 0.06 | 4 | 3.65 | 0.20 | 0 | 0.20 | -0.43 | 0 | 0.01 | -0.10 | 0 | 0.00 | -0.03 | -51.20 |
| Daniel Pitomac | 1086 | 62 | 0.06 | 5 | 3.48 | 0.86 | 0 | 0.19 | -0.42 | 0 | 0.01 | -0.10 | 0 | 0.00 | -0.03 | -12.70 |
| Tim McIntosh | 1082 | 100 | 0.09 | 10 | 9.15 | 0.48 | 0 | 0.83 | -1.82 | 0 | 0.07 | -0.72 | 0 | 0.01 | -0.28 | -23.30 |
| Melissa Brown | 1043 | 93 | 0.09 | 12 | 8.20 | 1.46 | 2 | 0.72 | 1.43 | 0 | 0.06 | -0.23 | 0 | 0.01 | -0.07 | -20.00 |
| Tasha Chambers | 1026 | 143 | 0.14 | 19 | 19.79 | -0.21 | 2 | 2.72 | -0.41 | 0 | 0.37 | -0.54 | 0 | 0.05 | -0.20 | -68.50 |
| David Sparks | 1016 | 59 | 0.06 | 7 | 3.37 | 2.10 | 0 | 0.19 | -0.41 | 0 | 0.01 | -0.10 | 0 | 0.00 | -0.02 | -15.10 |
| Mitchell Wood | 969 | 103 | 0.11 | 12 | 10.84 | 0.39 | 3 | 1.13 | 1.65 | 1 | 0.12 | 2.35 | 0 | 0.01 | -0.10 | -37.50 |
| Ben Moffat | 935 | 79 | 0.08 | 11 | 6.59 | 1.88 | 1 | 0.54 | 0.59 | 0 | 0.04 | -0.20 | 0 | 0.00 | -0.06 | -10.50 |
| Kacie Adams | 932 | 118 | 0.13 | 26 | 14.81 | 3.32 | 8 | 1.85 | 4.20 | 2 | 0.23 | 3.29 | 0 | 0.03 | -0.15 | -5.00 |
| Nicholas Perrett | 917 | 89 | 0.10 | 15 | 8.54 | 2.45 | 1 | 0.81 | 0.20 | 0 | 0.08 | -0.25 | 0 | 0.01 | -0.08 | 31.10 |
| Codie McPherson | 911 | 60 | 0.07 | 2 | 3.89 | -1.02 | 0 | 0.25 | -0.48 | 0 | 0.02 | -0.12 | 0 | 0.00 | -0.03 | -47.20 |
| Anna Hozack | 904 | 84 | 0.09 | 7 | 7.71 | -0.28 | 1 | 0.70 | 0.34 | 0 | 0.06 | -0.23 | 0 | 0.01 | -0.07 | -57.80 |
| Samantha Munro | 893 | 82 | 0.09 | 7 | 7.44 | -0.18 | 2 | 0.67 | 1.53 | 1 | 0.06 | 3.53 | 0 | 0.01 | -0.07 | -14.60 |
| Jake Hull | 885 | 108 | 0.12 | 15 | 13.06 | 0.61 | 0 | 1.57 | -1.17 | 0 | 0.19 | -0.39 | 0 | 0.02 | -0.13 | -30.60 |
| Elizabeth Weiszbach | 872 | 31 | 0.04 | 2 | 1.07 | 0.94 | 1 | 0.04 | 4.96 | 0 | 0.00 | -0.03 | 0 | 0.00 | -0.01 | -22.50 |
| Motoki Okada | 855 | 56 | 0.07 | 2 | 3.60 | -0.90 | 0 | 0.23 | -0.45 | 0 | 0.01 | -0.11 | 0 | 0.00 | -0.03 | -36.00 |
| Dean McWhinney | 826 | 65 | 0.08 | 7 | 5.04 | 0.95 | 2 | 0.38 | 2.47 | 1 | 0.03 | 5.28 | 0 | 0.00 | -0.04 | -17.00 |
| Ashlee Beer | 810 | 63 | 0.08 | 8 | 4.82 | 1.57 | 0 | 0.36 | -0.57 | 0 | 0.03 | -0.15 | 0 | 0.00 | -0.04 | -14.20 |
| Troy Phillips | 799 | 75 | 0.09 | 3 | 6.95 | -1.65 | 0 | 0.64 | -0.75 | 0 | 0.06 | -0.22 | 0 | 0.01 | -0.06 | -58.60 |
| Brett Fliedner | 753 | 33 | 0.04 | 1 | 1.40 | -0.36 | 0 | 0.06 | -0.23 | 0 | 0.00 | -0.05 | 0 | 0.00 | -0.01 | -30.38 |
| Cameron Lammas (NZ) | 740 | 124 | 0.17 | 20 | 20.61 | -0.16 | 5 | 3.40 | 0.81 | 2 | 0.56 | 1.68 | 1 | 0.09 | 2.59 | N/A |
| Neil Perryman | 738 | 79 | 0.11 | 10 | 8.35 | 0.64 | 2 | 0.87 | 1.13 | 0 | 0.09 | -0.27 | 0 | 0.01 | -0.09 | -21.50 |
| Terry Gillett | 712 | 42 | 0.06 | 4 | 2.42 | 1.08 | 0 | 0.14 | -0.35 | 0 | 0.01 | -0.08 | 0 | 0.00 | -0.02 | -22.00 |
| Eleanor Webster-Hawes | 686 | 48 | 0.07 | 2 | 3.29 | -0.76 | 0 | 0.22 | -0.45 | 0 | 0.01 | -0.12 | 0 | 0.00 | -0.03 | -11.00 |
| Andrew Woods | 672 | 58 | 0.09 | 8 | 4.92 | 1.52 | 2 | 0.41 | 2.35 | 1 | 0.03 | 4.95 | 0 | 0.00 | -0.05 | 19.30 |
| Annelise King | 652 | 60 | 0.09 | 5 | 5.43 | -0.20 | 0 | 0.48 | -0.66 | 0 | 0.04 | -0.19 | 0 | 0.00 | -0.06 | -34.00 |
| Brian Wood | 647 | 23 | 0.04 | 1 | 0.78 | 0.26 | 0 | 0.03 | -0.16 | 0 | 0.00 | -0.03 | 0 | 0.00 | -0.01 | -15.00 |
| Scott Hughes | 587 | 27 | 0.05 | 2 | 1.20 | 0.77 | 0 | 0.05 | -0.22 | 0 | 0.00 | -0.04 | 0 | 0.00 | -0.01 | -19.60 |
| Paul Timbery | 583 | 26 | 0.04 | 1 | 1.11 | -0.11 | 0 | 0.05 | -0.21 | 0 | 0.00 | -0.04 | 0 | 0.00 | -0.01 | -22.20 |
| Simone Montgomerie | 579 | 67 | 0.12 | 9 | 7.64 | 0.56 | 2 | 0.86 | 1.15 | 0 | 0.10 | -0.28 | 0 | 0.01 | -0.09 | -35.80 |
| Billy Owen | 569 | 90 | 0.16 | 19 | 14.08 | 1.56 | 6 | 2.18 | 2.41 | 1 | 0.33 | 1.01 | 0 | 0.05 | -0.19 | -24.10 |
| Malcolm Duce | 551 | 30 | 0.05 | 3 | 1.58 | 1.20 | 0 | 0.08 | -0.27 | 0 | 0.00 | -0.06 | 0 | 0.00 | -0.01 | -22.30 |
| Jonathan Riddell (NZ) | 521 | 110 | 0.21 | 27 | 23.01 | 1.05 | 4 | 4.78 | -0.33 | 0 | 0.99 | -0.84 | 0 | 0.20 | -0.37 | N/A |
| Michael Fitzgerald | 503 | 36 | 0.07 | 2 | 2.50 | -0.34 | 0 | 0.17 | -0.40 | 0 | 0.01 | -0.10 | 0 | 0.00 | -0.03 | -29.00 |
|  |  |  |  |  |  |  |  |  |  |  |  |  |  |  |  |  |
| Jeff Lloyd | 3180 | 539 | 0.17 | 100 | 91.2 | 3.12 | 24 | 15 | 2.13 | 8 | 2.6 | 2.9 | 3 | 0.44 | 3.26 |  |

Note: Shaded t-stats are significant at at least the 10% level
